# Supplementary material for: Pyrochlore phase Ce2Sn2O7via an atom-confining strategy for reversible lithium storage
Source: Royal Society of Chemistry journal article supplement (doi:10.1039/c9ta13602a), 2020-01-01
Supplement: c9ta13602a1.pdf [file c9ta13602a1.pdf]

## Supporting Information

### Pyrochlore Phase $\text{Ce}_2\text{Sn}_2\text{O}_7$ via Atomic-Confined Strategy for Reversible Lithium storage

*Jijian Xu<sup>1,2,3§</sup>, Dong Wang<sup>1§</sup>, Shuyi Kong<sup>1§</sup>, Ruizhe Li<sup>1</sup>, Zhanglian Hong<sup>2\*</sup>, Fuqiang Huang<sup>1,2\*</sup>*

<sup>1</sup> State Key Laboratory of High Performance Ceramics and Superfine Microstructure, Shanghai Institute of Ceramics, Chinese Academy of Sciences, Shanghai 200050, P.R. China;

<sup>2</sup> State Key Laboratory of Silicon Materials, School of Materials Science and Engineering, Zhejiang University, Hangzhou 310027, P.R. China;

<sup>3</sup> Department of Chemical and Biomolecular Engineering, University of Maryland, College Park, MD 20742, USA;

§These authors contributed equally to this work.

\*Corresponding Author: [huangfq@mail.sic.ac.cn](mailto:huangfq@mail.sic.ac.cn); [hong\\_zhanglian@zju.edu.cn](mailto:hong_zhanglian@zju.edu.cn)

## **1. Experimental Section**

### **1.1 Preparation of $\text{Ce}_2\text{Sn}_2\text{O}_7$**

All chemicals were purchased from Alladin and were used as received without purification. The precursor of the new compound  $\text{Ce}_2\text{Sn}_2\text{O}_7$  was prepared by a hydro-thermal method. In a typical procedure, 3 mmol  $\text{Na}_2\text{SnO}_3$ , 1.5 mmol  $\text{Ce}(\text{NO}_3)_3$  and 1g NaOH were dissolved in 20ml deionized water to obtain an aqueous solution. The solution was thoroughly mixed by vigorous stirring. Then the resulting slurry was transferred into an autoclave, and hydro-thermal treated at  $200^\circ\text{C}$  for 24 h. After naturally cooling, the resultant precursor was filtered and dried at  $80^\circ\text{C}$ . The as-synthesized precursors were subsequently heated at  $400^\circ\text{C}$  for 2 h to produce the final products.

### **1.2 Sample Characterization**

Raman spectra were collected on a Thermal Dispersive Spectrometer using a laser with an excitation wavelength of 532 nm at a laser power of 10 mW. XPS experiments were carried out on an RBD upgraded PHI-5000C ESCA system (Perkin Elmer) with Mg  $K\alpha$  radiation ( $h\nu = 1253.6$  eV). XRD patterns were obtained with a Bruker D8 advance diffractometer operating with Cu  $K\alpha$  radiation. The morphologies of the samples were observed on a JEOL-JEM 2100F transmission electron microscope (TEM) (100 kV) and a Hitachi S-4800 field emission scanning electron microscope (FE-SEM) (5 kV).

### **1.3 Electrode preparation and electrochemical testing**

Electrochemical measurements were performed using coin cells assembled in an argon-filled glove box (German, M. Braun Co., [O<sub>2</sub>] b 1 ppm, [H<sub>2</sub>O] b 1 ppm). The composite electrodes were made of the active material powder (80 wt%), acetylene black (10 wt%) and a polyvinylidene fluoride (PVDF) binder (10 wt%) homogeneously mixed in N-methyl pyrrolidinone (NMP) solvent and then coated uniformly on a copper foil. Pure lithium foil was used as a counter electrode. The electrolyte consisted of a solution of 1 M LiPF<sub>6</sub> in ethylene carbonate and dimethyl carbonate (EC + DMC + EMC) (1:1:1 in volume). Galvanostatic cycling of the assembled cells was carried out using a Land CT2001A tester (Wuhan, China) between cutoff voltages of 3.0 and 0.01 V at room temperature. A CHI760e electrochemical workstation was used for cyclic voltammetry measurements with a potential range between 0.01 and 3.0 V at a scan rate of 0.1 mV s<sup>-1</sup>.

**Table S1.** Fractional atomic coordinates and isotropic or equivalent isotropic displacement parameters ( $\text{\AA}^2$ ) of  $\text{Ce}_2\text{Sn}_2\text{O}_7$

|     | <i>x</i>  | <i>y</i> | <i>z</i> | $U_{\text{iso}}^*/U_{\text{eq}}$ |
|-----|-----------|----------|----------|----------------------------------|
| Ce1 | 0.00000   | 0.00000  | 0.00000  | 0.001 (3)*                       |
| Sn1 | 0.50000   | 0.50000  | 0.50000  | 0.01267*                         |
| O1  | 0.12500   | 0.12500  | 0.12500  | 0.00671*                         |
| O2  | 0.380 (3) | 0.12500  | 0.12500  | 0.03166*                         |

**Table S2.** Summary of the crystal parameters of  $\text{SnO}_2$ ,  $\text{CeO}_2$ , and  $\text{Ce}_2\text{Sn}_2\text{O}_7$ .

| Compound                           | Crystal System | Z | Packing factor (%) |
|------------------------------------|----------------|---|--------------------|
| $\text{SnO}_2$                     | Tetragonal     | 2 | 65.7               |
| $\text{CeO}_2$                     | Cubic          | 4 | 62.5               |
| $\text{Ce}_2\text{Sn}_2\text{O}_7$ | Cubic          | 8 | 56.8               |

**Table S3.** Comparison of electrochemical performances for Tin-based anodes.

| Anodes                                                   | Capacity@0.1 A $\text{g}^{-1}$<br>(mA h $\text{g}^{-1}$ ) | Rate capacity<br>(mA h $\text{g}^{-1}$ ) | References |
|----------------------------------------------------------|-----------------------------------------------------------|------------------------------------------|------------|
| Black (Sn,Ti) $\text{O}_2$                               | 583 (100 cycles)                                          | 335 (5 A $\text{g}^{-1}$ )               | ref 12     |
| Ordered network<br>of interconnected<br>$\text{SnO}_2$   | 564 (100 cycles)                                          | 300 (4.7 A $\text{g}^{-1}$ )             | ref S1     |
| $\text{SnO}_2\text{-Fe}_2\text{O}_3\text{-Li}_2\text{O}$ | 1150 (100 cycles)                                         | 747 (5 A $\text{g}^{-1}$ )               | ref 20     |
| Ag- $\text{SnO}_2/\text{NiO}$                            | 826 (500 cycles)                                          | 721 (5 A $\text{g}^{-1}$ )               | ref S2     |
| $\text{Zn}_2\text{SnO}_4$                                | 580 (50 cycles)                                           | none                                     | ref S3     |
| $\text{Ce}_2\text{Sn}_2\text{O}_7$                       | 631 (330 cycles)                                          | 384 (5 A $\text{g}^{-1}$ )               | This work  |

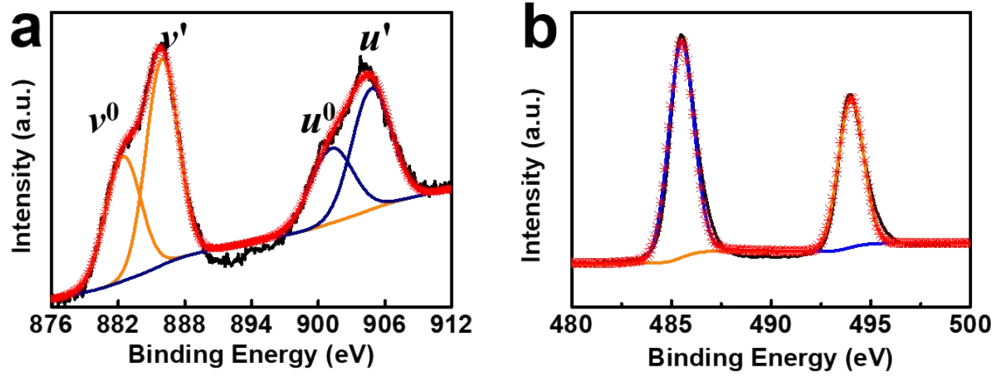

**Figure S1.** XPS spectra: (a) Ce 3d, (b) Sn 3d, of  $\text{Ce}_2\text{Sn}_2\text{O}_7$ .

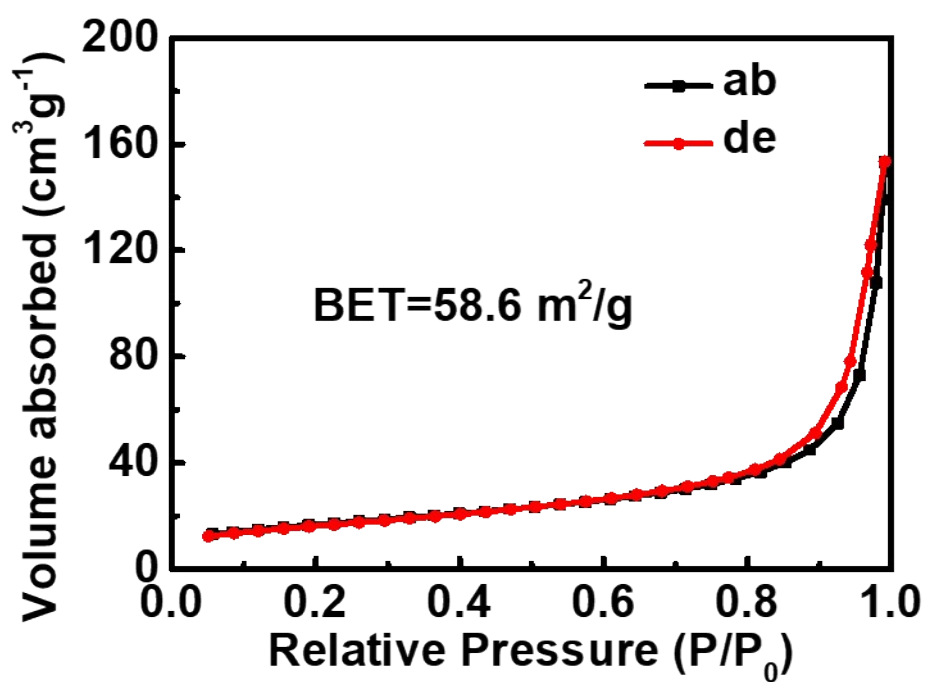

Figure S2. N<sub>2</sub> adsorption–desorption isotherm of Ce<sub>2</sub>Sn<sub>2</sub>O<sub>7</sub>.

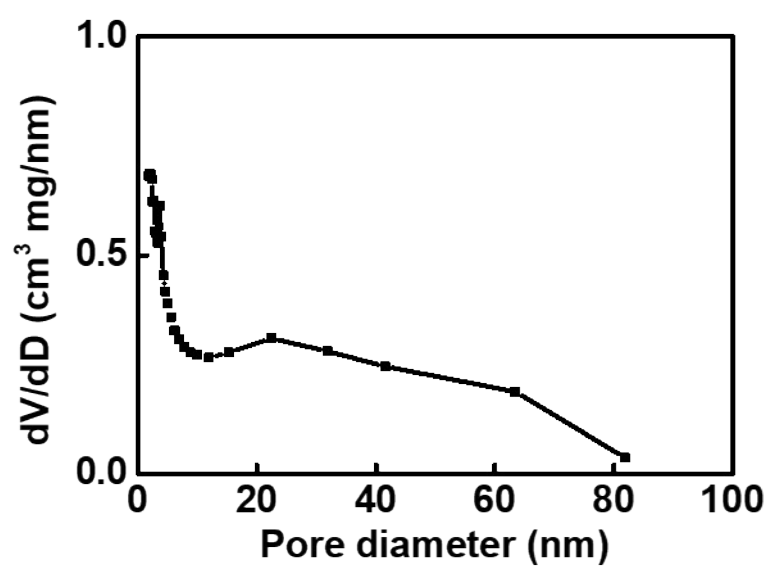

**Figure S3.** Pore size distribution of Ce<sub>2</sub>Sn<sub>2</sub>O<sub>7</sub>.

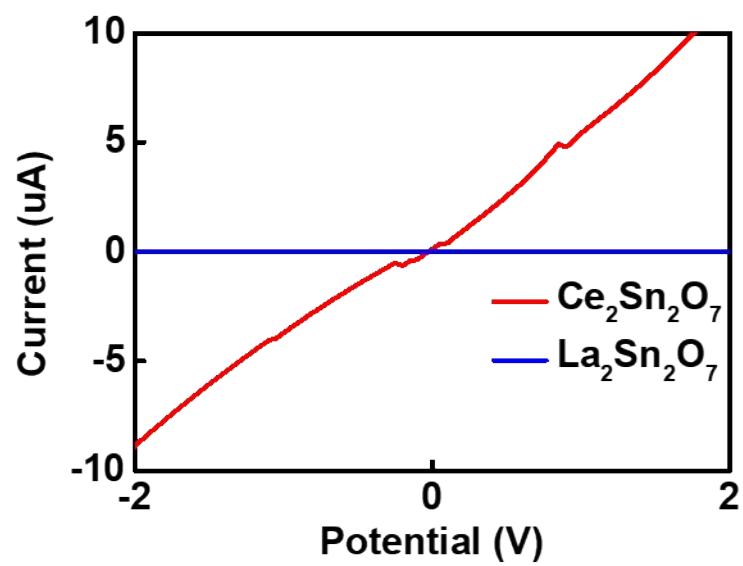

**Figure S4.** Room-temperature I-V characteristics of compressed pellets of La<sub>2</sub>Sn<sub>2</sub>O<sub>7</sub> and Ce<sub>2</sub>Sn<sub>2</sub>O<sub>7</sub>.



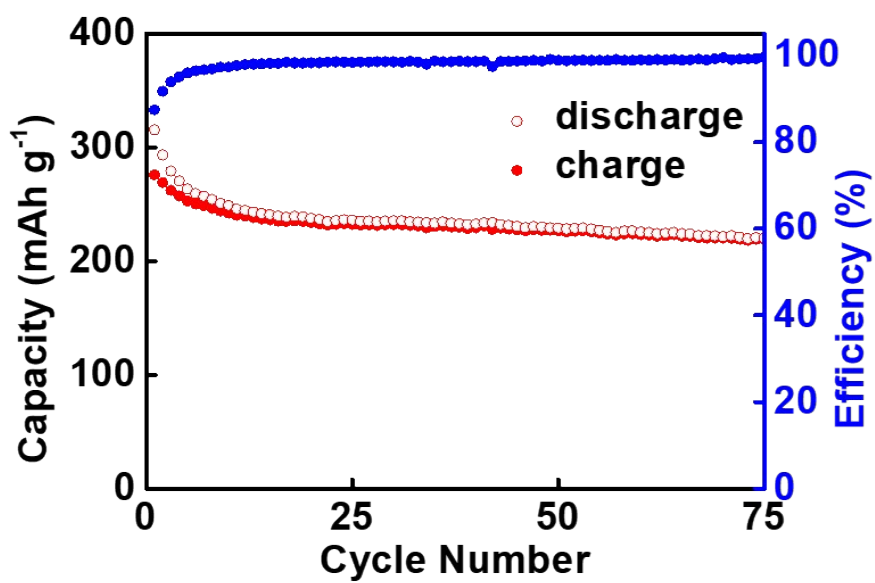

Figure S5. Cycle performance of CeO<sub>2</sub> electrode at a current density of 0.1 A/g.

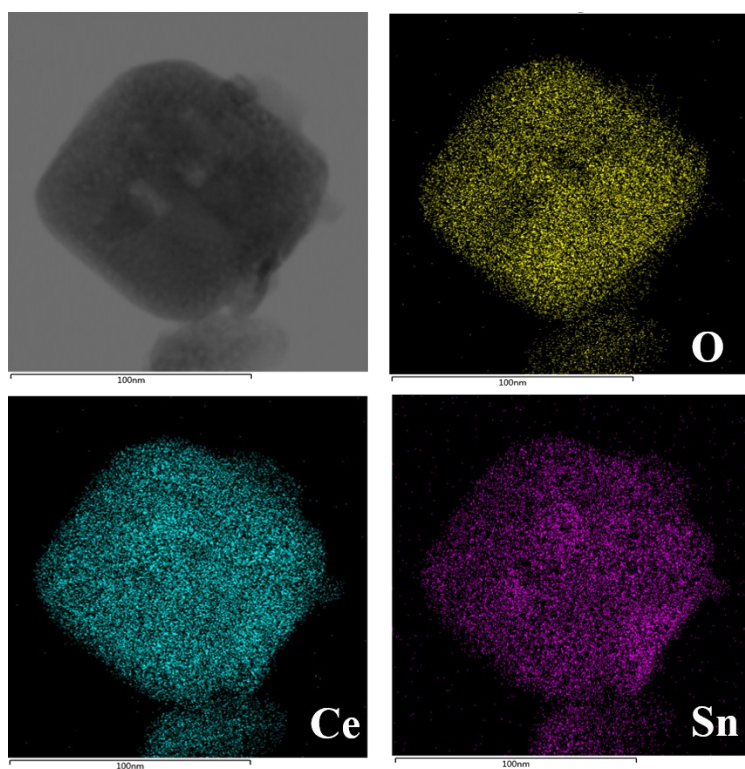

**Figure S6.** Elemental mapping images of  $\text{Ce}_2\text{Sn}_2\text{O}_7$  after 100 cycles.

[S1] V. Etacheri, G. A. Seisenbaeva, J. Caruthers, G. Daniel, J. M. Nedelec, V. G. Kessler, V. G. Poi, *Adv. Energy Mater.* 2015, 5, 1401289.

[S2] C. Kim, J. W. Jung, K. R. Yoon, D. Y. Youn, S. Park, I. D. Kim, A high-capacity and long-cycle-life lithium-ion battery anode architecture: silver nanoparticle-decorated SnO<sub>2</sub>/NiO nanotubes. *ACS nano*, 2016, 10, 11317-11326.

[S3] A. Rong, X. P. Gao, G. R. Li, T. Y. Yan, H. Y. Zhu, J. Q. Qu, D. Y. Song, Hydrothermal synthesis of Zn<sub>2</sub>SnO<sub>4</sub> as anode materials for Li-ion battery. *The Journal of Physical Chemistry B*, 2006, 110, 14754-14760.
